# Supplementary material for: Quantifying post-transcriptional regulation in the development of Drosophila melanogaster
Source: PubMed Central journal article supplement (PMC6255845; doi:10.1038/s41467-018-07455-9), 2018-11-26
Supplement: 41467_2018_7455_MOESM3_ESM.pdf [file 41467_2018_7455_MOESM3_ESM.pdf]

## Description of Additional Supplementary Files

**File Name:** Supplementary Data 1

**Description:** Results of model fitting and protein classification applied to paired mRNA/protein data: The table contains data for 3761 mRNA/protein pairs as well as relevant results obtained from the model fitting and protein classification analysis. A detailed description of each column is given in sheet 2 of the excel file. While f1 denotes results obtained using the full dataset, f2 indicates results obtained from analyzing post MZT (3h-20h) data only.
